# Supplementary material
Source: HighWire-hosted journal article supplement (https://www.annfammed.org/highwire/filestream/8408/field_highwire_adjunct_files/0/508Supp_Table_1.pdf)
Supplement: 508Supp_Table_1.pdf [file 508Supp_Table_1.pdf]

**Online Supplementary Material**

Lebrun-Harris LA, Shi L, Zhu J, Burke MT, Sripipatana A, Ngo-Metzger Q. Effects of patient-centered medical home attributes on patients' perceptions of quality in federally supported health centers. *Ann Fam Med*. 2013;11(6):508-516.

<http://www.annfammed.org/content/11/6/508>

| <b>Supplemental Table 1. Results of Factor Analysis (4 factors)</b>                                                                                                                                                                                                                    |                                                  |                             |                             |                             |                    |
|----------------------------------------------------------------------------------------------------------------------------------------------------------------------------------------------------------------------------------------------------------------------------------------|--------------------------------------------------|-----------------------------|-----------------------------|-----------------------------|--------------------|
| <b>Attribute</b>                                                                                                                                                                                                                                                                       | <b>Rotated Factor Loadings and Communalities</b> |                             |                             |                             |                    |
|                                                                                                                                                                                                                                                                                        | <b>Factor 1<sup>a</sup></b>                      | <b>Factor 2<sup>b</sup></b> | <b>Factor 3<sup>c</sup></b> | <b>Factor 4<sup>d</sup></b> | <b>Communality</b> |
| <b>Access to care</b>                                                                                                                                                                                                                                                                  |                                                  |                             |                             |                             |                    |
| How well is health center doing: ability to get in to be seen?                                                                                                                                                                                                                         | 0.330                                            | 0.212                       | 0.465                       | <b>0.545</b>                | 0.667              |
| How well is health center doing: hours center is open?                                                                                                                                                                                                                                 | 0.283                                            | 0.289                       | 0.309                       | <b>0.469</b>                | 0.479              |
| How well is health center doing: convenience of center's location?                                                                                                                                                                                                                     | 0.132                                            | 0.379                       | 0.187                       | <b>0.375</b>                | 0.336              |
| How well is health center doing: prompt return of calls?                                                                                                                                                                                                                               | 0.357                                            | 0.250                       | 0.395                       | <b>0.461</b>                | 0.559              |
| How well is health center doing: time in waiting room?                                                                                                                                                                                                                                 | 0.239                                            | 0.169                       | <b>0.796</b>                | 0.319                       | 0.821              |
| How well is health center doing: time in examination room?                                                                                                                                                                                                                             | 0.222                                            | 0.317                       | <b>0.767</b>                | 0.154                       | 0.762              |
| How well is health center doing: waiting time for test results?                                                                                                                                                                                                                        | 0.241                                            | 0.374                       | <b>0.444</b>                | 0.354                       | 0.520              |
| <b>Patient-centered communication</b>                                                                                                                                                                                                                                                  |                                                  |                             |                             |                             |                    |
| Provider staff listens to you?                                                                                                                                                                                                                                                         | 0.437                                            | <b>0.725</b>                | 0.279                       | 0.214                       | 0.839              |
| Provider staff takes enough time with you?                                                                                                                                                                                                                                             | 0.411                                            | <b>0.765</b>                | 0.280                       | 0.202                       | 0.873              |
| Provider staff explains what you want to know?                                                                                                                                                                                                                                         | 0.348                                            | <b>0.760</b>                | 0.265                       | 0.289                       | 0.852              |
| Nurses and medical assistants answer your questions?                                                                                                                                                                                                                                   | <b>0.675</b>                                     | 0.490                       | 0.208                       | 0.332                       | 0.848              |
| Nurses and medical assistants are friendly and helpful to you?                                                                                                                                                                                                                         | <b>0.711</b>                                     | 0.416                       | 0.220                       | 0.277                       | 0.804              |
| Other staff is friendly and helpful to you?                                                                                                                                                                                                                                            | <b>0.836</b>                                     | 0.271                       | 0.286                       | 0.193                       | 0.892              |
| Other staff answers your questions?                                                                                                                                                                                                                                                    | <b>0.843</b>                                     | 0.285                       | 0.249                       | 0.209                       | 0.898              |
| Variance                                                                                                                                                                                                                                                                               | 3.349                                            | 2.859                       | 2.384                       | 1.559                       | 10.151             |
| Variance (%)                                                                                                                                                                                                                                                                           | 23.925                                           | 20.421                      | 17.025                      | 11.137                      | 72.507             |
| Note: Correlations for selected items are bolded.<br><sup>a</sup> Patient-centered communication with support staff.<br><sup>b</sup> Patient-centered communication with clinicians.<br><sup>c</sup> Access to care during the visit.<br><sup>d</sup> Access to care in getting there. |                                                  |                             |                             |                             |                    |
